# Supplementary material for: Human Transcriptomic Response to the VSV-Vectored Ebola Vaccine
Source: MDPI journal article supplement (doi:10.3390/vaccines9020067), 2021-01-20
Supplement: s1 [file s1]

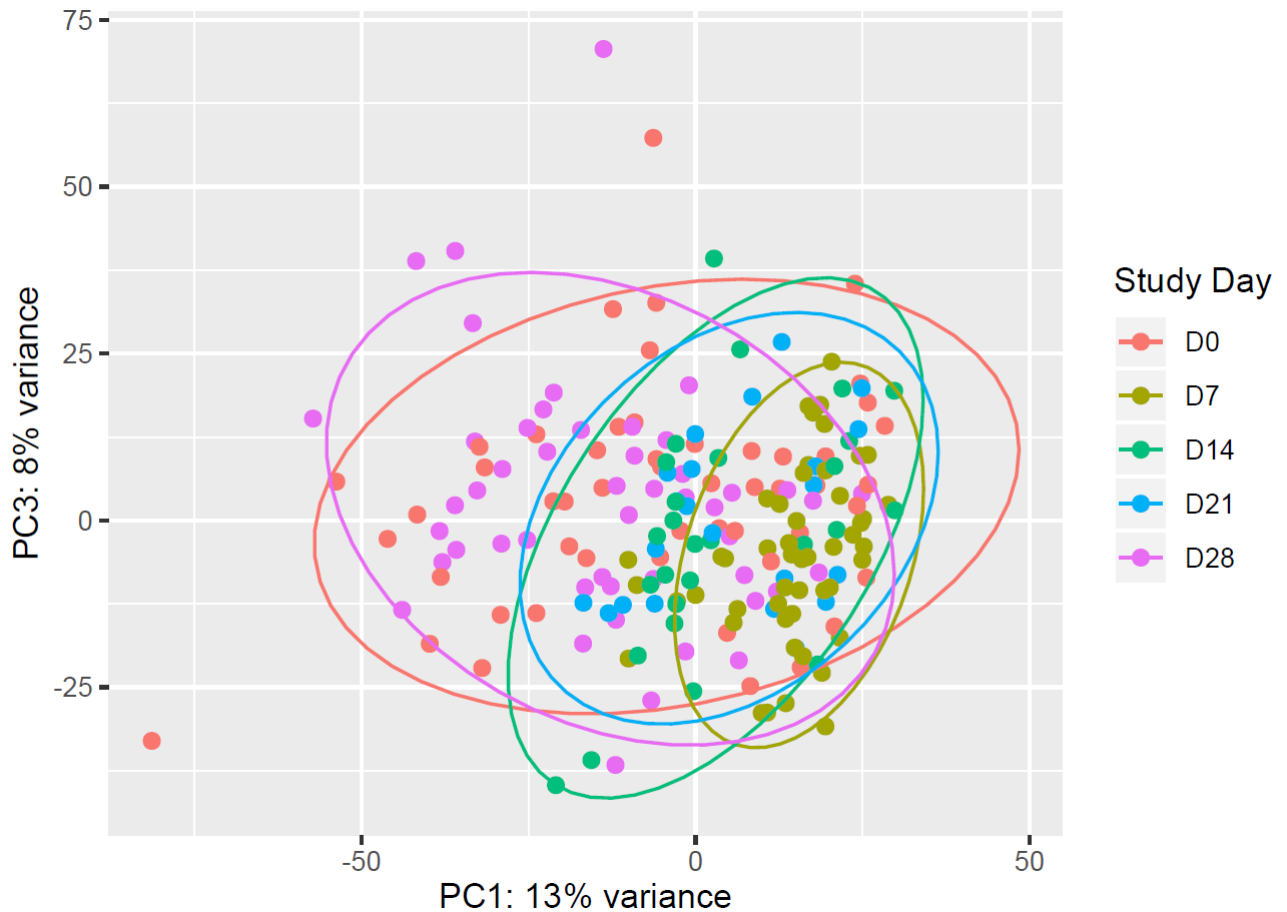

**Figure S1. Principal component analysis of gene expression data from days 0, 7, 14, 21, and 28.** Each dot represents a sample and the distance between two points reflects the variance in gene expression. Different colours correspond to different study days. PC1 and PC3 accounted for 13% and 8%, respectively, of the contribution to the variance. Coloured ellipses define the normal confidence interval (95%) for each group of samples. No clear clustering can be detected, but day 7, day 14 and day 21 samples form more homogeneous groups compared to baseline or day 28.
