# Supplementary material for: Human Transcriptomic Response to the VSV-Vectored Ebola Vaccine
Source: MDPI journal article supplement (doi:10.3390/vaccines9020067), 2021-01-20
Supplement: s1 [file s1]

A

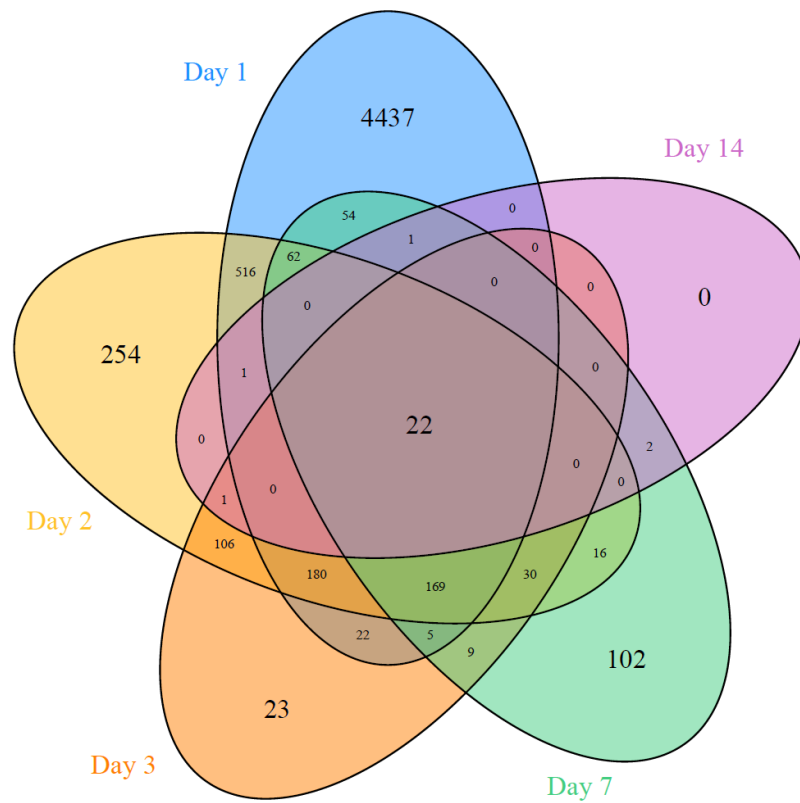

B

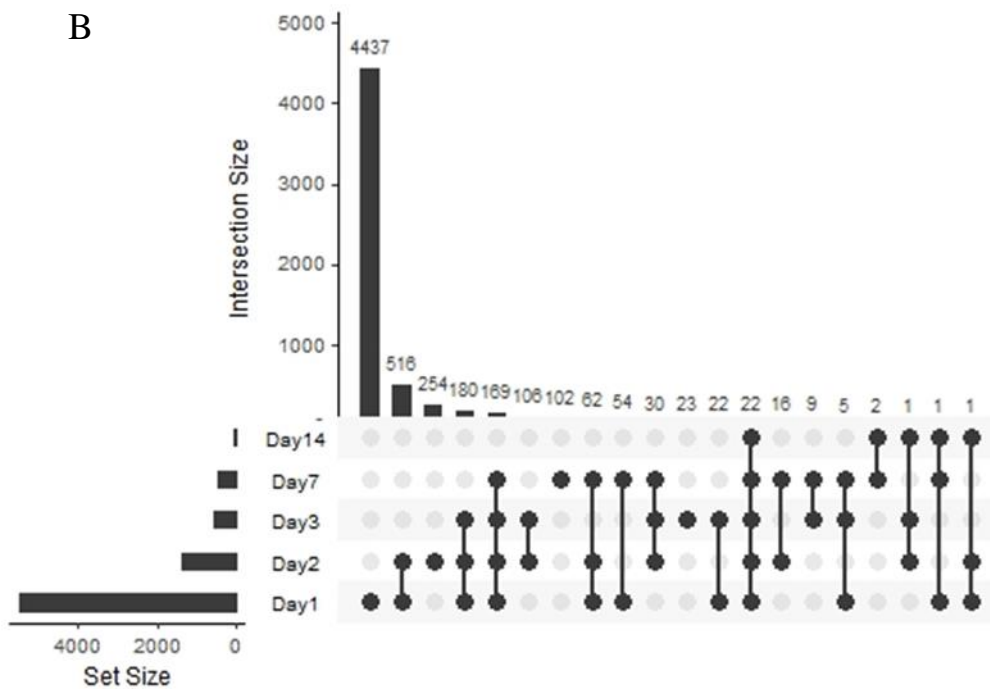

**Figure S2. Number of differentially expressed genes shared among the different study days.**

Panel A shows a Venn diagram in which each section is coloured by study day and numbers in the intersection indicate the shared genes. Panel B shows an UpSet plot of the same data: histograms in the low left panel represent the number of differentially expressed genes by study day, histograms in the upper panel represent the number of genes corresponding to the intersections indicated by solid black dots in the lower panel, sorted by number of genes. Empty intersections are not shown.
