# Supplementary material for: Human Transcriptomic Response to the VSV-Vectored Ebola Vaccine
Source: MDPI journal article supplement (doi:10.3390/vaccines9020067), 2021-01-20
Supplement: s1 [file s1]

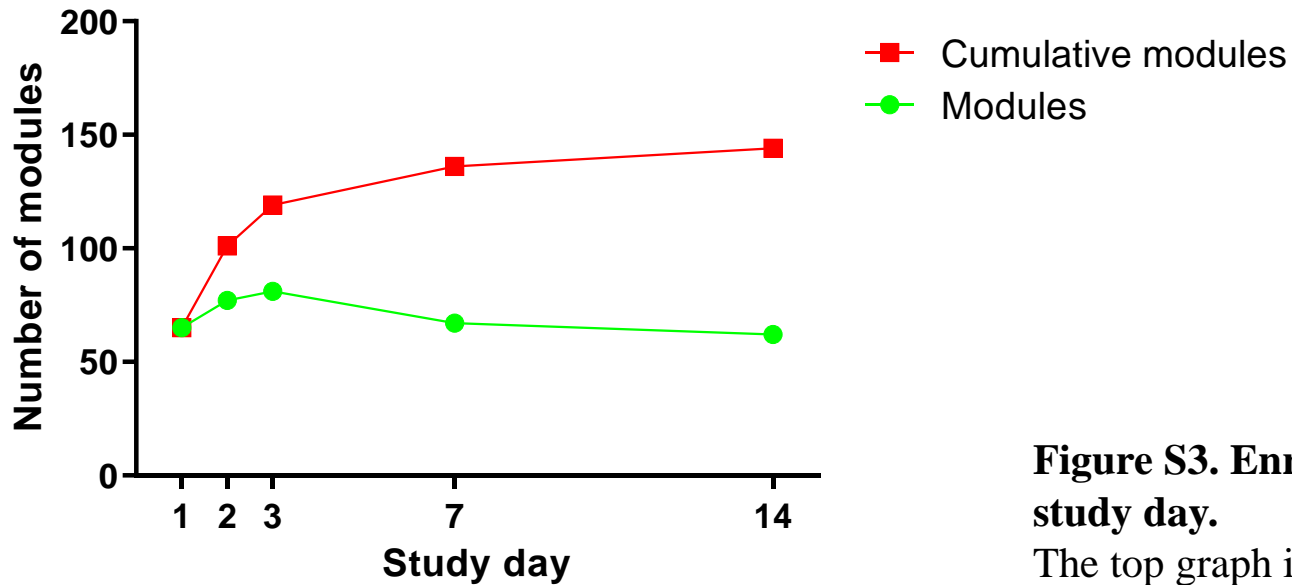

**Figure S3. Enrichment of BTMs by study day.**

The top graph illustrates the number of significantly ( $FDR < 0.05$ ) enriched modules at each analyzed time point (green line). Overall 144 different modules become activated in the two weeks following vaccination. The red line represents the number of unique BTMs that become enriched, reflecting the evolution of the immune response over time.

Number of enriched BTMs are reported in the table below.

| Day | Significant Modules | Cumulative modules |
|-----|---------------------|--------------------|
| 1   | 65                  | 65                 |
| 2   | 77                  | 101                |
| 3   | 81                  | 119                |
| 7   | 67                  | 136                |
| 14  | 62                  | 144                |
